# Supplementary material for: Genomic analysis of transcriptional networks directing progression of cell states during MGE development
Source: PubMed Central journal article supplement (PMC6138899; doi:10.1186/s13064-018-0119-4), 2018-09-14
Supplement: 13064_2018_119_MOESM3_ESM.pdf [file 13064_2018_119_MOESM3_ESM.pdf]

Sequences of hs623KO founders.

Sequence 5' of deletion.

Sequence 3' of deletion.

Deleted sequence in founder.

Sequence hs623KO founder #1:

>MS\_432601-502\_1-1-TOPO-T7\_G01.ab1

```
NNNNNNNNNGCNGCTCGAGCGCCGCCAGTGTGATGGATATCTGCAGAATTCGCCCTTGAGCAGTGTATTAAAAAAAT
CACCACACACACACACACACCCTCAAACCTGTGCATTTTATAAATTAGGCTTTTGCATTGTTGCTGTTGGCCTAAGCAA
GTGATTTTCAATTACAGTAAGCACACCAACCTCTCCAGAGTGATCTACTGGGGCAGACTTAAGAGGGAAAAAAATTAATG
ACAGCAATGAAACCATCTCTAGAAAAAAACCTGAAAGCCACCTAGAATTTAATTGTCAGGAAAAACAAGCAGCAAAGGAGA
ATTGAATCTGTTTTAAGCTCACACAATTCAGAAATAAAGTGTATCTTAATCTAGTGTGAGGTGGAGACAAAATCTGTTAA
GAAAGAGGCATATAATATCCTAGAGAGGGGCAAGAACCTGATGAAGGGCGAATTCAGCACACTGGCGGCCGTTACTA
GTGGATCCGAGCTCGGTACCAAGCTTGATGCATAGCTTGAGTATTCTATAGTGTACCTAAAATAGCTTGGCGTAATCATG
GTCATAGCTGTTTCTGTGTAATTTGTTATCCGCTCACAATTCACACAACATACGAGCCGGAAGCATAAAGTGTAAAG
CCTGGGGTGCCTAATGAGTGAGCTAACTCACATTAATTGCGTTGCGCTCACTGCCCGCTTCCAGTCGGGAAACCTGTCCG
TGCCAGCTGCATTAATGAATCGGCCAACGCGCGGGGAGAGCGGTTTGGCGTATTGGGCGCTTCCGCTTCTCGCTCAC
TGACTCGCTGCGCTCGTTCGGTTCGGTTCGGGCGAGCGGTATCAGCTCACTCAAAGGCGGTAATACGGTTATCCACAGAAT
CAGGGGATAACGCNNGAAAGAACATGTGAGCAAAAGGCCAGCAAAAGGCCAGGAACCGTAAAAAGGCCCGCTTGTGGCG
TTTTTCCATAGGCTCCGCCCTGACGAGCATCAAAAAATCGACGCTCAAGTCAGANGTGGCGAAANCCGACAGGACT
ATAAAGATACCAGGCGTTTTCCCCNNNGTCCCTCNGCGNNCNNGNTNCGACCCNNNNCTANNNNNCNNNCNNNT
TNNCCNNTNNGGANCNGNGCTTTCTCANNANCTCANGCNNNANGNNTTCTCANNNGNNNNNGNCNNNNNNNNNNNGN
CNNNNNNNNNCNNNNCCNNTNNCANNCCNNAACCGNNNNNNNNNCNNNN
```

>mm9\_dna range=chr9:71822294-71824207 5'pad=500 3'pad=500 strand=+  
repeatMasking=none

```
TTATGTAAAGTAAATCCATCTGGATGTTTGGCTCCATCCCATACTAGAAAC
CTGTGATCCCCAACAGAATGAGTTATAGGAAAGCTGCAGGCAAAATTGT
CTCCATACAGCACAAATCCATTATCCCTGTCAAGTTAATGTTCCGTGTTGA
GCCATATGGCACGGGTACACATTCACAAAAGGAAATTCCTTAAACTTGT
ATAATCAGCACTTGCAGTCATCCAAAAAAGTACATAAACAGCTTTATTG
TGTTTAGCACATTTTCAAGTTAATATCCATGACAAAAACAGGAAACAGTACA
GGAAAAGGAGGAGGAATGTGGGGAGCAGTGTATTTAAAAAAATCACCAC
ACACACACACACACACCCTCAAACCTGTGCATTTTATAATTAGGCTTTTGT
CATTGTTGCTGTTGGCCTAAGCAAGTGATTTTCAATTACAGTAAGCACAC
CAACCTCTCCAGAGTGATCTACTGGGGCAGACTTAAGAGGGAAAAAAAT
AATGACAGCAATTTCCATGGTATGAGCAAACTAAACCTTGAATTCTA
GTGATTCAGATAAATCAGTTCTGGCAAAATAACAAAATCTAAATCCTTA
TATTTGTTTTCTTCTACAGTCATTTTATAAATTGTTAAATGCAACTGAG
CTTTATTAAGGAAAAAGAAACCAACGCAATTTAAGTAAAGTATCTTCATA
TGCATTTAAGAGCAGGTACAGAAAATCAAGGGCTCCCAAGCCTTTGG
TACTCGGCACATCAACTCTAGTCAAGGTATAAGTAGAGCAGAACTTCAAT
TCAGCCCCCGCAGTGACAACAATAAAATGCTGAGAAAACACACTATCAA
TACTGAACTCAGCATCAATTTCTGTTAATTACAGCCTTGTGAGCAACGTG
ATTATTCAAACAACCTCATGCAATGTTAATGAGGCCTTATTTGCATATTT
ATTTTTCTTTGTTGAAATGTCATTGATTATTACATTCTACTATGATGA
ATGTGGCTGATGATGTGCTCTGATATGTAATTAGTCATTAGGTAGAATGA
ATAGATCAATTATGAAAAAGGACTAAGATTAAGAAATATCAACAAGACC
GCCCAAGCTAACTATAGAATCTTTTTTAAAAGGACCTAATAAATAATTT
CTTGACATTTAAACTGCAACATCAGTAGTTTTTCGATAAATAAAGGACTAC
TTTTGTGAGGTTAAATGAAGGCTTAAAAATACATCAGTACTCTGATAATC
CAATTACGATCACAGAAACCATCTCTAGAAAAAAACCTGAAAGCCACCTA
GAATTTAATTGTCAGGAAAAACAAGCAGCAAAGGAGAATTGAATCTGTTTT
AAGCTCACACAATTCAGAAATAAAGTGTATCTTAATCTAGTGTGAGGTGG
AGACAAAATCTGTTAAGAAAGAGGCATATAATATCCTAGAGAGAGGGGCA
AGAACCTGATGGAGAATTACTATTATAAAAACAGGGTTAGCCAAAAAAA
AAAACCAAAAAACAAAAAAACAAAAAAACCAAAACCCCTTTACATG
```

GTGACTTGTGCTCAGAGGAAAGGATTATTTAGCTCCTGAAACAGTTTGGCT  
GTAACATATCCAGCCAGTACTTGTCTATTTCGCAGTTGAAAAAAAAAAAAAAAA  
AAACCACATTACTGCAGACCAGATGGGAACATTCCACATGACCAAACCAA  
TCAATCACCTCGGTGGGGCGCAGGTGCAACACAGCCGTGTAGCAACACAC  
CATTTCACAGTCTATCGGGCACAACACATGGCCACCAATCAATGGCACC  
CTGAGGACCTCGGAGGGGGCAGGCTCTCTGGAGTCTTACTGGTCCATGCC  
TGATGACTTCATAATCACACATCATTTCATTCACTAGAGGATACAAACTA  
GCATTCTAATAACC

Sequence hs623KO founder #2:

>MS\_432601-503\_1-2454-topo- T7\_H01.ab1

NNNNNNNNNGCATGCTCGAGCGGCCGCGCAGTGTGATGGATATCTGCAGAATTCGCCCTTGAGCAGTGTATTAAAAAA  
ATCACCACACACACACACACCCTCAAACCTGTGCATTTTATAAATTAGGCTTTTGTCAATTGTTGCTGTTGGCCTAAGC  
AAGTGATTTTCAATTACAGTAAGCACACCAACCTCTCCAGAGTGATCTACTGGGGCAGACTTAAGAGGGAAAAAATTA  
TGACAGCAATTTCCATCTCTAGAAAAAACCTGAAAGCCACCTAGAATTTAATTGTGAGAAAAACAAGCAGCAAAGGAG  
AATGAAATCTGTTTAAAGCTCACACAATTCAGAAATAAAGTGTATCTTAATCTAGTGTGAGGTGGAGACAAAACTGTTA  
AGAAAGAGGCATATAAATATCTAGAGAGAGGGGCAAGAACCTGATGAAGGGCAATTCCAGCACACTGGCGGCCGTTACT  
AGTGGATCCGAGCTCGGTACCAAGCTTGTATGATAGCTTGTAGTATTCTATAGTGTCACTAAATAGCTTGGCGTAATCAT  
GGTCATAGCTGTTTCTGTGTGAAATTGTTATCCGCTCACAAATCCACACAACATACGAGCCGGAAGCATAAAGTGTAAA  
GCCTGGGGTGCCTAATGAGTGAAGTAACTACATTAATTGCGTTGCGCTCACTGCCGCTTCCAGTCGGGAAACCTGTC  
GTGCCAGCTGCATTAATGAATCGGCCAACGGCGGGGAGAGCGGTTTGGCGTATTGGGCGCTCTTCCGCTTCTCGCTCA  
CTGACTCGTGCCTCGGTCGTTGCGTGCGGGAGCGGTATCAGCTCAAAAGGCGGTAATACGGTTATCCACAGAA  
TCAGGGGATAACGCNNAAGAACATGTGAGCAAAAGGCCAGCAAAAGGCCAGAACCGTAAAAAGCCGCGTGTGGCG  
TTTTCCATNGGCTCCGCCCCCTGACGAGCATCAAAAAATCGACGCTCAAGTCAGNNNGGNGAAACCCGACAGGACTA  
TAAGATACCAGCGTTTCCCCCNGGAAGCTCCCNNGGCTCTCNNNTNCGACCCNNNNNTANNNNACNNTCNNTNNN  
CNNNCGGANNNNNCTTCTCANNANNNNNNCNNNANGNNTCTCANNNGNNTNNNCNNNNNNNNNNNGCNCNNNN  
NNCNCNNNNCCNNNNNNCCNANNGNNTNNNNCC

>mm9\_dna range=chr9:71822294-71824207 5'pad=500 3'pad=500 strand=+  
repeatMasking=none

TTATGTAAAGTAAATCCATCTGGATGTTTGTCTCCATCCCATACTAGAAAC  
CTGTGATCCCCAACAGAATGAGTTATAGGAAAGCTGCAGGCAAAATTGT  
CTCCATACAGCACAAATCCATTATCCCTGTCAAGTTAATGTTCCGTGTTGA  
GCCATATGGCACGGGTACACATTCACAAAGGAAATTCCTTAAACTTGT  
ATAATCAGCACTTGCAGTCATCCAAAAACTGACATAAACAGCTTTATTG  
TGTTTAGCACATTTTCAAGTTAATATCCATGACAAAAACAGGAAACAGTACA  
GGAAAAGGAGGAGGAATGTGGGGAGCAGTGTATTTAAAAAATCACCAC  
ACACACACACACACACCCTCAAACCTGTGCATTTTATAATTAGGCTTTTGT  
CATTGTTGCTGTTGGCCTAAGCAAGTGAATTTCAATTACAGTAAGCACAC  
CAACCTCTCCAGATGATCTACTGGGGCAGACTTAAGAGGGAAAAAAT  
AATGACAGCAATTTCCATGGTATGAGCAAACTAAACCTTGAATTTCTA  
GTGATTAGATAAATCAGTTCTGGCAAAATAACAAACTCTAAATCCTTA  
TATTTGTTTTCTTTCTACAGTCATTTTATAAATTGTTAAAATGCAACTGAG  
CTTTATTAAGGAAAAAGAAACCAACGCAATTTAAGTAAAGTATCTTCATA  
TGCATTTAAGAGCAGGTACAGAAAATCAAGGGCTCCACAAGCCTTTGG  
TACTCGGCACATCAACTCTAGTCAAGGTATAAGTAGAGCAGAACTTCATT  
TCAGCCCCCGCAGTGACAACAATAAAATGCTGAGAAAAACACTATCAA  
TACTGAACTCAGCATCAATTTCTGTTAATTACAGCCTTGTGAGCAACGTG  
ATTATTCAAACAACCTCATGCAATGTTAATGAGGCCTTATTTGCATATTT  
ATTTTTCTTTGTTGAAATGTCATTGATTATTACATTCTACTATGATGA  
ATGTGGCTGATGATGTGCTCTGATATGTAATTAGTCATTAGGTAGAATGA  
ATAGATCAATTATGAAAAAGGACTAAGATTAAGAAATATCAAACAAGACC  
GCCCAACGTAACATAGAATCTTTTTTTAAAAGGACCTAATAAATAATTT  
CTTGACATTTAAACTGCAACATCAGTAGTTTTTCGATAAATAAAGGACTAC  
TTTTGTGAGGTTAAATGAAGGCTTAAAAATACATCAGTACTCTGATAATC  
CAATTACGATCACAGAAACCTCTCTAGAAAAAACCTGAAAGCCACCTA  
GAATTTAATTGTGAGGAAACAAGCAGCAAGGAGAATTGAATCTGTTTT  
AAGCTCACACAATTCAGAAATAAAGTGTATCTTAATCTAGTGTGAGGTGG  
AGACAAAATCTGTTAAGAAAGAGGCATATAATATCCTAGAGAGAGGGGCA



AAGCTCACACAATTCAGAAATAAAGTGTATCTTAATCTAGTGTGAGGTGG  
AGACAAAATCTGTTAAGAAAGAGGCATATAATATCCTAGAGAGAGGGGCA  
AGAACCTGATGGAGAATTACTATTTCATAAAACAGGGTTAGCCAAAAA  
AAAACCAAAAAACAAAAAACAAAAAACCAAAACCCCTTTACATG  
GTGACTTGTGCTCAGAGGAAAGGATTATTTAGCTCCTGAAACAGTTTGCT  
GTAACCTATCCAGCCAGTACTTGTATTTCGCAGTTGAAAAAAAAAAAA  
AAACCACATTTACTGCAGACCAGATGGGAACATTCACATGACCAAACCA  
TCAATCACCTCGGTGGGGCGCAGGTGCAACACAGCCGTGTAGCAACACAC  
CATTTCACAGTCTATCGGGCACAAACACATGGCCACCAATCAATGGCACC  
CTGAGGACCTCGGAGGGGGCAGGCTCTCTGGAGTCTTACTGGTCCATGCC  
TGATGACTTCATAATCACACATCATTTCATTCACTAGAGGATACAAACTA  
GCATTCTAATAACC

Sequence hs623KO founder #4 (F0 = 2458):

>MS\_432601-505\_1-2458-topo-T7\_C02.ab1

NNNNNNNNNGCNTGCTCGAGCGGCCGCGCAGTGTGATGGATATCTGCAGAATTCGCCCTTGAGCAGTGTATTAAAAAA  
ATCACCACACACACACACACCCTCAAACCTGTGCATTTATAATTAGGCTTTGTCATTGTTGCTGTTGGCCTAAGC  
AAGTGATTTTCAATTACAGTAAGCACACCAACCTCTCCAGAGTGATCTACTGGGGCAGACTTAAGAGGGAAAAAATTA  
TGACAGCAATTTCCATGGACGATCACAGAAACCATCTCTAGAAAAAACCTGAAAGCCACCTAGAATTTAATTGTCAGG  
AAAACAAGCAGCAAAGGAGAATTGAATCTGTTTTAAGCTCACACAATTCAGAAATAAAGTGTATCTTAATCTAGTGTGAG  
GTGGAGACAAAATCTGTTAAGAAAGAGGCATATAATATCCTAGAGAGAGGGGCAAGAACCTGATGAAGGGCGAATCCAG  
CACACTGGCGCCGTTACTAGTGGATCCGAGCTCGGTACCAAGCTTGATGCATAGCTTGAGTATTCTATAGTGTACCTA  
AATAGCTTGGCGTAATCATGGTCATAGCTGTTTCCCTGTGTGAAATTGTTATCCGCTCACAAATCCACACAACATACGAGC  
CGGAAGCATAAAGTGTAAGCCTGGGGTGCCTAATGAGTGAGCTAACTCACATTAATTGCGTTGCGCTCACTGCCCGCTT  
TCCAGTCGGGAAACCTGTCGTGCCAGCTGCATTAATGAATCGGCCAAGCGCGGGGAGAGGGGTTTGGCTATTGGGGC  
TCTTCCGCTTCTCGCTCACTGACTCGCTCGCTCGGTGCTGCTGCGGCTCGGGCAGCGGTATCAGCTCACTCAAAGGCGGT  
AATACGGTTATCCACAGAATCAGGGGATAACGCNNGAAAGAACATGTGAGCAAAAGGNCAGCAAAAGGCCAGGAACCGTA  
AAAAGCCGCGTTGCTGGCGTTTTCCATAGGCTCCGCCCCCTGACGAGCATCACAAAATCGACGCTCAAGTCANAGG  
TGGNAAACCCCGACAGGACTATAAAGATACCAGGCGTTTTCCCNNNNNCTCCCTCNGCNNNNTCNCNGTCNACCNNCN  
CTTACNNATACNGTCNNNTNCTCCNTNGNNNCGNGGCGTTNNNCATAGCTCANGCNNNAGNATCTCANNTCNNNNNNNG  
NCNNNNNCTNNNNNNNNNNNNNNNNNNNCNANCNCCNNNCTNCCNNCNCNNANCNNNNNNNNNNN

>mm9\_dna range=chr9:71822294-71824207 5'pad=500 3'pad=500 strand=+  
repeatMasking=none

TTATGTAAAGTAAATCCATCTGGATGTTTGTCTCCATCCCATACTAGAAAC  
CTGTGATCCCCAACAGAATGAGTTATAGGAAAGCTGCAGGCAAAATTGT  
CTCCATACAGCACAAATCCATTATCCCTGTCAAGTTAATGTTCCGTGTTGA  
GCCATATGGCACGGGTACACATTCACAAAGGAAATTCCTTAAACTTGT  
ATAATCAGCACTTGCAGTCATCCAAAAACTGACATAAACAGCTTTATTG  
TGTTTTAGCACATTTTCAAGTTAATATCCATGACAAAAACAGGAAACAGTACA  
GGAAAAGGAGGAGGAATGTGGGGAGCAGTGTATTTAAAAAATCACCAC  
ACACACACACACACACCCTCAAACCTGTGCATTTTATAATTAGGCTTTTGT  
CATTGTTGCTGTGGCCTAAGCAAGTGAATTTCAATTACAGTAAGCACAC  
CAACCTCTCAGAGTACTACTGGGGCAGACTTAAGAGGGAAAAAATTA  
AATGACAGCAATTTTCCATGGTATGAGCAAACTAAACCTTGAAATTCTA  
GTGATTACAGATAAATCAGTTCTGGCAAAATAACAAACTCTAAATCCTTA  
TATTTGTTTTCTTTCTACAGTCATTTTATAATTGTTAAAATGCAACTGAG  
CTTTATTAAGGAAAAAGAAACCAACGCAATTTAAGTAAAGTATCTTCATA  
TGCATTTAAGAGCAGGTACAGAAAATCAAGGGCTCCACAAGCCTTTGG  
TACTCGGCACATCAACTCTAGTCAAGGTATAAGTAGAGCAGAACTTCATT  
TCAGCCCCCGCAGTGACAACAATAAAATGCTGAGAAAAACACTATCAA  
TACTGAACTCAGCATCAATTTCTGTTAATTACAGCCTTGTGAGCAACGTG  
ATTATTCAAACAACCTCATGCAATGTTAATGAGGCCTTATTTGCATATTT  
ATTTTTCTTTGTTGAAATGTCATTGATTATTACATTCTACTATGATGA  
ATGTGGCTGATGATGTGCTCTGATATGTAATTAGTATTAGGTAGAATGA  
ATAGATCAATATGAAAAAGGACTAAGATTAAGAAATATCAAACAAGACC  
GCCAACGTAACATATAAGAACTTTTTTTTTAAAAGGACCTAATAAATAATTT  
CTTGACATTTAAACTGCAACATCAGTAGTTTTTCGATAAATAAAGGACTAC  
TTTTGTGAGGTTAAATGAAGGCTTAAAAATACATCAGTACTCTGATAATC  
CAATTACGATCACAGAAACCATCTCTAGAAAAAACCTGAAAGCCACCTA

GAATTTAATTGTCAGGAAAACAAGCAGCAAAGGAGAATTGAATCTGTTTT  
AAGCTCACACAATTACAGAAATAAAGTGTATCTTAATCTAGTGTGAGGTGG  
AGACAAAATCTGTTAAGAAAGAGGCATATAATATCCTAGAGAGAGGGGCA  
AGAACCTGATGGAGAATTACTATTCATAAAAACAGGGTTAGCCAAAAA  
AAAACCAAAAAAACAACAAAAAACAACAAAAAACCACAAACCCCTTTACATG  
GTGACTTGTGCTCAGAGGAAAGGATTATTTAGCTCCTGAAACAGTTTGCT  
GTAACATCCAGCCAGTACTTGTCTATTCGCAGTTGAAAAAAAAAAAAAAAA  
AAACCACATTAATGCAGACCAGATGGGAACATTCCACATGACCAAACCAA  
TCAATCACCTCGGTGGGGCGCAGGTGCAACACAGCCGTGTAGCAACACAC  
CATTTCACAGTCTATCGGGCACAAACACATGGCCACCAATCAATGGCACC  
CTGAGGACCTCGGAGGGGGCAGGCTCTCTGGAGTCTTACTGGTCCATGCC  
TGATGACTTCATAATCACACATCATTTCATTACTAGAGGATACAAACTA  
GCATTCTAATAACC

Sequence hs623KO founder #5:

>MS\_432601-506\_1-2459-topo-\_T7\_D02.ab1  
NNNNNNNNNNNGNNGCTCGAGCGGCCCGCAGTGTGATGGATATCTGCAGAATTCGCCCTT  
ATCACCACACACACACACACACACCCCTCAAACCTGTGCATTTATAATTAGGCTTTTGTCA  
AAGTGATTTCAAATTACAGTAAGCACACCAACCTCTCCAGAGTGATCTACTGGGCAGACT  
TGACAGCAATTTCTGTGATCACAGAAACCATCTCTAGAAAAAACCTGAAAGCCACTAGA  
CAAGCAGCAAAGGAGAATTGAATCTGTTTAAAGTCTCACACAATTACAGAAATAAAGTGT  
AGACAAAATCTGTTAAGAAAGAGGCATATAATATCCTAGAGAGAGGGGCAAGAACCTGAT  
AAGGGCGAATTCAGCACA  
CTGGCGCCGTTACTAGTGGATCCGAGCTCGGTACCAAGCTTGATGCATAGCTTGAGTATT  
GCTTGGCGTAATCATGGTCATAGCTGTTTCTGTGTGAAATGTTATCCGCTCACAATCCAC  
AGCATAAAGTGTAAAGCCTGGGGTGCCTAATGAGTGAGCTAACCTCACATTAATTGCGT  
GTGCGGAAACCTGTGTCGAGCTGCATTAATGAATCGGCCAACCGCGGGGAGAGGCGGTT  
CGCTTCCCTCGTCACTGACTGCTGCGCTCGGTTCGGTTCGGCTGGCGGAGCGGTATCA  
CGTTATCCACAGAATCANGGATAACCGCAGGAAAGAACATGTGAGCAAAGGCCAGCAA  
GGCGCGTTGCTGGCGTTTTCCATAGGCTCGCCCCCTGACGAGCATCACAAAATCGACG  
GAAACCCGACAGGACTATAAAGANACCAGGCGTTTCCCNGNNNNNTCCNNNNNNNNN  
ACNGNATACNGTCNCNTTCCNNGGNANNNNNNGGNGCTTNCNCATANCNNNGC  
GNCNNNNNNNNNNCNGGNNNNNGNNNNNNNNCANNCCNANNNNNNNNNNN

>mm9\_dna range=chr9:71822294-71824207 5'pad=500 3'pad=500 strand=+  
repeatMasking=none  
TTATGTAAAGTAAATCCATCTGGATGTTTGTCTCCATCCCATACTAGAAAC  
CTGTGATCCCCAACCGAATGAGTTATAGGAAAGCTGCAGGCAAAATTGT  
CTCCATACAGCACAATCCATTATCCCTGTCAAGTTAATGTTCCGTGTTGA  
GCCATATGGCACGGGTACACATTCAACAAAGGAAATTCCTTAACTTGT  
ATAATCAGCATTGTCAGTCAACAAAAACTGACATAAACAGCTTTATTG  
TGTTTACACATTTAGTTAATATCCATGACAAAAACAGGAAACAGTACA  
GGAAAAGGAGGGAATGTGGGGAGCAGTGTATTTAAAAAATCACCAC  
ACACACACACACACACCCCTCAAACCTGTGCATTTTATAATTAGGCTTTTGT  
CATTGTTGCTGTTGGCCTAAGCAAGTGATTTTCAATTACAGTAAGCACAC  
CAACCTCTCCAGAGTGATCTACTGGGCAGACTTAAGAGGGAAAAAAT  
AATGACAGCAATTTTCATGGTATGAGCAAACTAAACCTTGAATTC  
GTGATTAGATAAATCAGTTCTGGCAAAATAACAACTCTAAATCCTTA  
TATTTGTTTTCTTTCTACAGTCATTTTATAATTGTTAAAATGCAACTGAG  
CTTTATTAAGGAAAAAGAAACCAACGCAATTTAAGTAAAGTATCTTCATA  
TGCATTTAAGAGCAGGTACAGAAAATCAAGGGCTCCCAAGCCTTTGG  
TACTCGGCACATCAACTCTAGTCAAGGTATAAGTAGAGCAGAACTTCA  
TCAGCCCCCGCAGTGACAACAATAAAATGCTGAGAAAAACACTATCAA  
TACTGAACCTCAGCATCAATTTCTGTTAATTACAGCCTTGTGAGCAACGTG  
ATTATTCAACAACACTCATGCAAAATGTTAATGAGGCCTTATTTGCATATT  
ATTTTTCTTTGTTGAAATGTCATTGATTATTACATTCTACTATGATGA  
ATGTGGCTGATGATGTGCTCTGATATGTAATTAGTCATTAGGTAGAATGA  
ATAGATCAATTATGAAAAAGGACTAAGATTAAGAAATATCAACAAGACC  
GCCCAACGTAACATAGAATCTTTTTTAAAAGGACCTAATAAATAATTT  
CTTGACATTTAACTGCAACATCAGTAGTTTTTCGATAAATAAAGGACTAC

TTTTGTGAGGTTAAATGAAGGCTTAAAAATACATCAGTACTCTGATAATC  
CAATTACGATCACAGAAACCATCTCTAGAAAAAACCTGAAAGCCACCTA  
GAATTTAATTGTCAGGAAAAACAAGCAGCAAAGGAGAATTGAATCTGTTTT  
AAGCTCACACAATTCAGAAATAAAGTGTATCTTAATCTAGTGTGAGGTGG  
AGACAAAATCTGTTAAGAAAGAGGCATATAATATCCTAGAGAGAGGGGCA  
AGAACCTGATGGAGAATTACTATTCATAAAACAGGGTTAGCCAAAAAAA  
AAAACCAAAAAACAAAAAACAAAAAACCAAAACCCCTTTACATG  
GTGACTTGTGCTCAGAGGAAAGGATTATTTAGCTCCTGAAACAGTTTGCT  
GTAACATCCAGCCAGTACTTGCTATTTCGCAGTTGAAAAAAAAAAAAAA  
AAACCACATTACTGCAGACCAGATGGGAACATTCCACATGACCAAACAA  
TCAATCACCTCGGTGGGGCGCAGGTGCAACACAGCCGTGTAGCAACACAC  
CATTTACAGTCTATCGGGCACAAACACATGGCCACCAATCAATGGCACC  
CTGAGGACCTCGGAGGGGGCAGGCTCTCTGGAGTCTTACTGGTCCATGCC  
TGATGACTTCATAATCACACATCATTTCAATTCAGTAGAGGATACAAACTA  
GCATTCTAATAACC
