# Supplementary material for: Genomic analysis of transcriptional networks directing progression of cell states during MGE development
Source: PubMed Central journal article supplement (PMC6138899; doi:10.1186/s13064-018-0119-4), 2018-09-14

*Tcf12* - e13.5

A

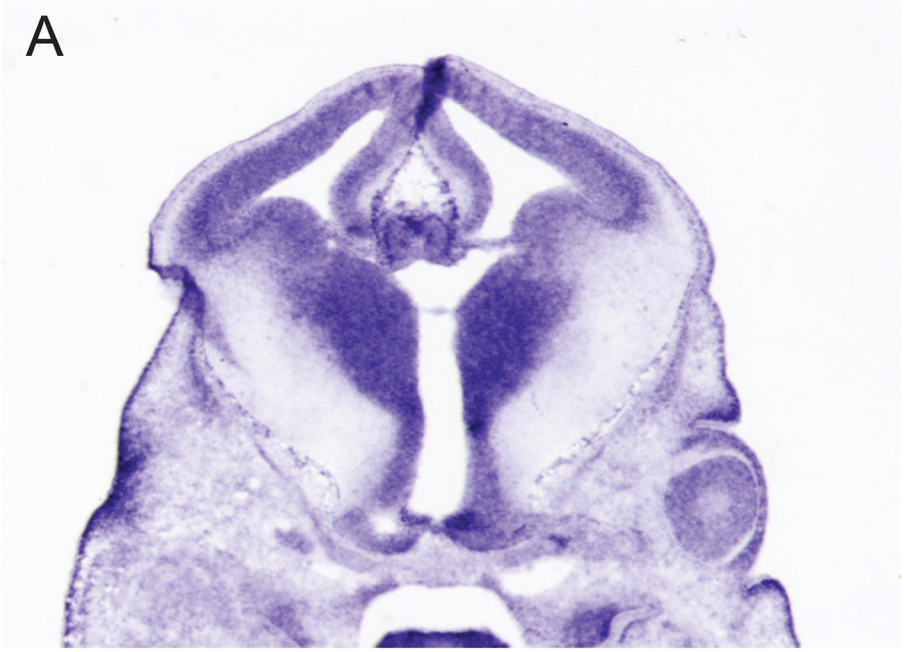

B

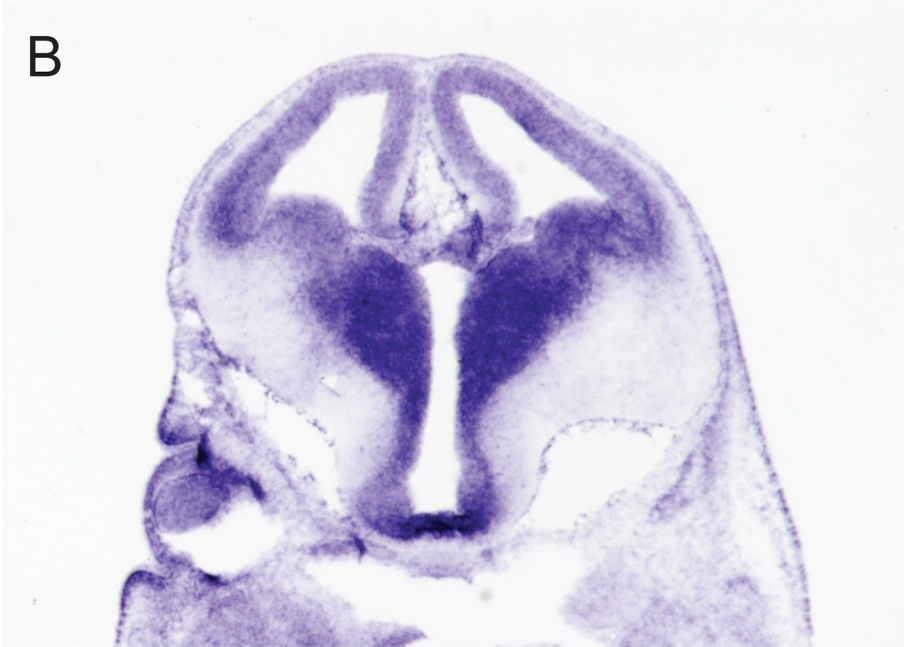

Supplement: 13064_2018_119_MOESM4_ESM.pdf [file 13064_2018_119_MOESM4_ESM.pdf]
